# Supplementary material for: Modulating organic functional groups in stimuli-responsive luminescent antimony chlorides
Source: Royal Society of Chemistry journal article supplement (doi:10.1039/d4tc01344a), 2024-01-01
Supplement: d4tc01344a1.pdf [file d4tc01344a1.pdf]

Supporting Information for

## Modulating organic functional groups in stimuli-responsive luminescent antimony chlorides

Yi Liu,<sup>a,c,d†</sup> Dan-Dan Huang,<sup>a,c,d†</sup> Zhi-Zhuan Zhang,<sup>c</sup> Hao-Wei Lin,<sup>a,c</sup> Ke-Zhao Du,<sup>b\*</sup>, Ze-Ping Wang,<sup>c\*</sup> and Xiao-Ying Huang<sup>c,d\*</sup>

<sup>a</sup>. College of Chemistry, Fuzhou University, Fuzhou 350108, P. R. China.

<sup>b</sup>. Fujian Provincial Key Laboratory of Advanced Materials Oriented Chemical Engineering, Fujian Normal University, 32 Shangsang Road, Fuzhou 350007, P. R. China.

<sup>c</sup>. State Key Laboratory of Structural Chemistry, Fujian Institute of Research on the Structure of Matter, Chinese Academy of Sciences, Fuzhou, Fujian 350002, P. R. China.

<sup>d</sup>. Fujian College, University of Chinese Academy of Sciences, Fuzhou 350002, P.R. China.

† Yi Liu and Dan-Dan Huang contributed equally to this work.

E-mail: [xyhuang@fjirsm.ac.cn](mailto:xyhuang@fjirsm.ac.cn)

E-mail: [duke@fjnu.edu.cn](mailto:duke@fjnu.edu.cn)

E-mail: [wzping520@msn.cn](mailto:wzping520@msn.cn)

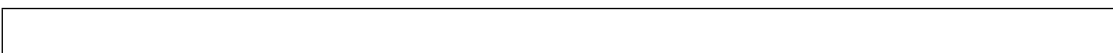

**Table S1.** Crystal data and structure refinement for compound **1**, **2** and **3**.

|                                                     | <b>1</b>                                                                        | <b>2</b>                                                                           | <b>3</b>                                                                         |
|-----------------------------------------------------|---------------------------------------------------------------------------------|------------------------------------------------------------------------------------|----------------------------------------------------------------------------------|
| CCDC number                                         | 2341218                                                                         | 2344297                                                                            | 2341219                                                                          |
| Empirical formula                                   | C <sub>24</sub> H <sub>39</sub> N <sub>6</sub> Cl <sub>6</sub> SbO <sub>6</sub> | C <sub>36</sub> H <sub>51</sub> Cl <sub>6</sub> N <sub>12</sub> O <sub>12</sub> Sb | C <sub>18</sub> H <sub>27</sub> N <sub>6</sub> O <sub>6</sub> Cl <sub>6</sub> Sb |
| Formula weight                                      | 842.06                                                                          | 1178.34                                                                            | 757.90                                                                           |
| Temperature/K                                       | 100(2)                                                                          | 100(2)                                                                             | 100(2)                                                                           |
| Wavelength/Å                                        | 1.54178                                                                         | 1.54178                                                                            | 1.54178                                                                          |
| Crystal system                                      | orthorhombic                                                                    | trigonal                                                                           | monoclinic                                                                       |
| Space group                                         | <i>Pbca</i>                                                                     | <i>R</i> <sup>3</sup>                                                              | <i>P2</i> <sub>1</sub> / <i>c</i>                                                |
| <i>a</i> /Å                                         | 20.4908(3)                                                                      | 21.8818(4)                                                                         | 20.7233(11)                                                                      |
| <i>b</i> /Å                                         | 16.2409(3)                                                                      | 21.8818(4)                                                                         | 8.7393(3)                                                                        |
| <i>c</i> /Å                                         | 21.6024(4)                                                                      | 8.6170(3)                                                                          | 17.6064(9)                                                                       |
| <i>α</i> /°                                         | 90                                                                              | 90                                                                                 | 90                                                                               |
| <i>β</i> /°                                         | 90                                                                              | 90                                                                                 | 114.637(6)                                                                       |
| <i>γ</i> /°                                         | 90                                                                              | 120                                                                                | 90                                                                               |
| Volume/Å <sup>3</sup>                               | 7189.0(2)                                                                       | 3573.16(18)                                                                        | 2898.4(3)                                                                        |
| <i>Z</i>                                            | 8                                                                               | 3                                                                                  | 4                                                                                |
| $\rho_{\text{calc}}$ g/cm <sup>3</sup>              | 1.556                                                                           | 1.643                                                                              | 1.737                                                                            |
| Absorption coefficient/mm <sup>-1</sup>             | 1.258                                                                           | 0.987                                                                              | 1.549                                                                            |
| <i>F</i> (000)                                      | 3408.0                                                                          | 1800.0                                                                             | 1512.0                                                                           |
| Crystal size/mm <sup>3</sup>                        | 0.25 × 0.15 × 0.04                                                              | 0.25 × 0.15 × 0.04                                                                 | 0.25 × 0.15 × 0.04                                                               |
| Theta range for data collection /°                  | 6.584-50.046                                                                    | 7.398-57.458                                                                       | 6.904-54.202                                                                     |
| Reflections collected/ unique                       | 35961/6345 [ <i>R</i> <sub>int</sub> = 0.0610]                                  | 6917/1902 [ <i>R</i> <sub>int</sub> = 0.0431]                                      | 35961/6345 [ <i>R</i> <sub>int</sub> = 0.0610]                                   |
| Refinement method                                   | Full-matrix least-squares on <i>F</i> <sup>2</sup>                              | Full-matrix least-squares on <i>F</i> <sup>2</sup>                                 | Full-matrix least-squares on <i>F</i> <sup>2</sup>                               |
| Data/restraints/parameters                          | 6345/1068/505                                                                   | 1902/1/106                                                                         | 6242/3/349                                                                       |
| Goodness-of-fit on <i>F</i> <sup>2</sup>            | 1.410                                                                           | 1.006                                                                              | 1.065                                                                            |
| Final <i>R</i> indexes [ <i>I</i> ≥ 2σ( <i>I</i> )] | <i>R</i> <sub>1</sub> = 0.1047, <i>wR</i> <sub>2</sub> = 0.2321                 | <i>R</i> <sub>1</sub> = 0.0304, <i>wR</i> <sub>2</sub> = 0.0662                    | <i>R</i> <sub>1</sub> = 0.0274, <i>wR</i> <sub>2</sub> = 0.0554                  |
| Final <i>R</i> indexes [all data]                   | <i>R</i> <sub>1</sub> = 0.1191, <i>wR</i> <sub>2</sub> = 0.2381                 | <i>R</i> <sub>1</sub> = 0.0412, <i>wR</i> <sub>2</sub> = 0.0726                    | <i>R</i> <sub>1</sub> = 0.0373, <i>wR</i> <sub>2</sub> = 0.0616                  |
| Largest diff. peak and hole                         | 1.12/-1.29                                                                      | 0.47/-0.39                                                                         | 0.62/-0.43                                                                       |

[a]  $R_1 = \sum \|F_o\| - \|F_c\| / \sum \|F_o\|$ , [b]  $wR_2 = [\sum w(F_o^2 - F_c^2)^2 / \sum w(F_o^2)^2]^{1/2}$

**Table S2.** Selected bond length (Å) and bond angle (°) for **1**, **2** and **3**.

| <b>1</b>                                                                        |            |                       |             |
|---------------------------------------------------------------------------------|------------|-----------------------|-------------|
| Sb(1)-Cl(4)                                                                     | 2.549(3)   | Sb(1)-Cl(5)           | 2.717(4)    |
| Sb(1)-Cl(2)                                                                     | 2.580(3)   | Sb(1)-Cl(3)           | 2.744(3)    |
| Sb(1)-Cl(6)                                                                     | 2.592(3)   | Sb(1)-Cl(1)           | 2.809(4)    |
| Cl(4)-Sb(1)-Cl(2)                                                               | 88.66(10)  | Cl(6)-Sb(1)-Cl(3)     | 176.96(11)  |
| Cl(4)-Sb(1)-Cl(6)                                                               | 86.24(11)  | Cl(5)-Sb(1)-Cl(3)     | 90.53(11)   |
| Cl(2)-Sb(1)-Cl(6)                                                               | 91.80(10)  | Cl(4)-Sb(1)-Cl(1)     | 172.91(11)  |
| Cl(4)-Sb(1)-Cl(5)                                                               | 90.02(11)  | Cl(2)-Sb(1)-Cl(1)     | 90.13(11)   |
| Cl(2)-Sb(1)-Cl(5)                                                               | 178.66(11) | Cl(6)-Sb(1)-Cl(1)     | 86.82(11)   |
| Cl(6)-Sb(1)-Cl(5)                                                               | 88.30(11)  | Cl(5)-Sb(1)-Cl(1)     | 91.21(11)   |
| Cl(4)-Sb(1)-Cl(3)                                                               | 90.96(10)  | Cl(3)-Sb(1)-Cl(1)     | 96.01(11)   |
| Cl(2)-Sb(1)-Cl(3)                                                               | 89.30(10)  |                       |             |
| Symmetry transformations used to generate equivalent atoms: N.A. for <b>1</b> . |            |                       |             |
| <b>2</b>                                                                        |            |                       |             |
| Sb(1)-Cl(1)                                                                     | 2.6487(5)  |                       |             |
| Cl(1)#1-Sb(1)-Cl(1)#2                                                           | 88.327(17) | Cl(1)#3-Sb(1)-Cl(1)#5 | 88.327(17)  |
| Cl(1)#1-Sb(1)-Cl(1)#3                                                           | 88.327(17) | Cl(1)#4-Sb(1)-Cl(1)#5 | 88.326(17)  |
| Cl(1)#2-Sb(1)-Cl(1)#3                                                           | 91.673(17) | Cl(1)#1-Sb(1)-Cl(1)   | 91.673(17)  |
| Cl(1)#1-Sb(1)-Cl(1)#4                                                           | 180.0      | Cl(1)#2-Sb(1)-Cl(1)   | 88.326(17)  |
| Cl(1)#2-Sb(1)-Cl(1)#4                                                           | 91.673(17) | Cl(1)#3-Sb(1)-Cl(1)   | 180.0       |
| Cl(1)#3-Sb(1)-Cl(1)#4                                                           | 91.674(17) | Cl(1)#4-Sb(1)-Cl(1)   | 88.326(17)  |
| Cl(1)#1-Sb(1)-Cl(1)#5                                                           | 91.674(17) | Cl(1)#5-Sb(1)-Cl(1)   | 91.674(17)  |
| Cl(1)#2-Sb(1)-Cl(1)#5                                                           | 180.00(2)  |                       |             |
| Symmetry transformations used to generate equivalent atoms: N.A. for <b>2</b>   |            |                       |             |
| <b>3</b>                                                                        |            |                       |             |
| Sb(1)-Cl(1)                                                                     | 2.5430(6)  | Sb(1)-Cl(4)           | 2.5866(6)   |
| Sb(1)-Cl(2)                                                                     | 2.4050(6)  | Sb(1)-Cl(5)           | 2.7379(6)   |
| Sb(1)-Cl(3)                                                                     | 2.6540(6)  | Sb(1)-Cl(6)           | 3.3245(7)   |
| Cl(2)-Sb(1)-Cl(1)                                                               | 90.55(2)   | Cl(4)-Sb(1)-Cl(5)     | 97.56(2)    |
| Cl(2)-Sb(1)-Cl(4)                                                               | 85.55(2)   | Cl(3)-Sb(1)-Cl(5)     | 83.743(19)  |
| Cl(1)-Sb(1)-Cl(4)                                                               | 91.01(2)   | Cl(2)-Sb(1)-Cl(6)     | 174.710(19) |
| Cl(2)-Sb(1)-Cl(3)                                                               | 87.61(2)   | Cl(1)-Sb(1)-Cl(6)     | 91.83(2)    |
| Cl(1)-Sb(1)-Cl(3)                                                               | 87.57(2)   | Cl(4)-Sb(1)-Cl(6)     | 89.685(19)  |
| Cl(4)-Sb(1)-Cl(3)                                                               | 173.00(2)  | Cl(3)-Sb(1)-Cl(6)     | 97.210(18)  |
| Cl(2)-Sb(1)-Cl(5)                                                               | 88.67(2)   | Cl(5)-Sb(1)-Cl(6)     | 89.692(19)  |
| Cl(1)-Sb(1)-Cl(5)                                                               | 171.30(2)  |                       |             |

Symmetry transformations used to generate equivalent atoms: N.A. for **3**.

**Table S3.** Hydrogen bonds data for **1**, **2** and **3**.

| D-H...A                 | d(D-H) | d(H...A) | d(D...A)  | <(DHA) |
|-------------------------|--------|----------|-----------|--------|
| <b>1</b>                |        |          |           |        |
| C(1)-H(1A)...Cl(3)      | 0.95   | 2.92     | 3.703(14) | 140.3  |
| C(2)-H(2A)...Cl(2)#1    | 0.95   | 2.67     | 3.502(13) | 146.3  |
| C(3)-H(3A)...Cl(1)#2    | 0.95   | 2.89     | 3.450(18) | 119.0  |
| C(3)-H(3A)...Cl(5)#2    | 0.95   | 2.71     | 3.534(14) | 144.9  |
| C(4)-H(4A)...Cl(5)#2    | 0.98   | 2.85     | 3.712(17) | 147.3  |
| C(4)-H(4C)...Cl(5)      | 0.98   | 2.71     | 3.65(2)   | 159.4  |
| C(5)-H(5A)...Cl(6)#2    | 0.99   | 2.90     | 3.554(14) | 124.7  |
| C(5)-H(5B)...Cl(3)#1    | 0.99   | 2.80     | 3.546(13) | 133.0  |
| C(7)-H(7B)...O(5B)#3    | 0.99   | 2.42     | 2.93(3)   | 111.7  |
| C(9)-H(9A)...Cl(1)#4    | 0.95   | 2.83     | 3.558(13) | 134.3  |
| C(10)-H(10A)...Cl(4)#5  | 0.95   | 2.64     | 3.566(14) | 164.5  |
| C(11)-H(11A)...Cl(2)    | 0.95   | 2.69     | 3.376(14) | 129.7  |
| C(11)-H(11A)...Cl(6)    | 0.95   | 2.76     | 3.548(13) | 141.3  |
| C(12)-H(12A)...Cl(6)    | 0.98   | 2.87     | 3.769(15) | 153.0  |
| C(13)-H(13A)...Cl(3)#5  | 0.99   | 2.72     | 3.647(14) | 155.2  |
| C(13)-H(13B)...Cl(2)    | 0.99   | 2.96     | 3.774(14) | 140.7  |
| C(13)-H(13B)...Cl(4)    | 0.99   | 2.92     | 3.641(14) | 130.2  |
| C(15)-H(15A)...O(5B)#5  | 0.99   | 2.63     | 3.59(3)   | 163.8  |
| C(15)-H(15B)...Cl(1)#6  | 0.99   | 2.84     | 3.757(15) | 153.6  |
| C(17)-H(17A)...Cl(3)#7  | 0.95   | 2.79     | 3.72(3)   | 169.3  |
| C(18)-H(18A)...Cl(1)#7  | 0.95   | 2.56     | 3.26(2)   | 130.4  |
| C(19)-H(19C)...Cl(5)    | 0.95   | 2.44     | 3.24(2)   | 142.5  |
| C(21)-H(21A)...Cl(5)    | 0.99   | 2.59     | 3.41(3)   | 140.1  |
| C(17B)-H(17B)...Cl(3)#7 | 0.95   | 2.68     | 3.32(3)   | 124.7  |
| C(19B)-H(19A)...Cl(5)   | 0.95   | 2.86     | 3.67(4)   | 145.0  |
| C(19B)-H(19A)...O(3)#1  | 0.95   | 2.52     | 3.21(4)   | 129.0  |
| C(20B)-H(20F)...O(3)#1  | 0.98   | 2.29     | 3.21(4)   | 156.1  |
| C(23B)-H(23C)...N(3)#8  | 0.99   | 2.68     | 3.38(4)   | 127.9  |
| C(24B)-H(24E)...N(1)#2  | 0.98   | 2.59     | 3.52(4)   | 156.7  |

Symmetry transformations used to generate equivalent atoms:

#1 1/2-x, 1/2+y, +z; #2 1-x, 1-y, 1-z; #3 +x, 3/2-y, -1/2+z; #4 1-x, -y, 1-z; #5 1/2-x, -1/2+y, +z; #6 -1/2+x, 1/2-y, 1-z; #7 +x, 1/2-y, 1/2+z; #8 1-x, 1/2+y, 3/2-z

---

**2**

|                      |           |           |          |        |
|----------------------|-----------|-----------|----------|--------|
| O(1)-H(1)···O(11)    | 0.817(10) | 1.648(14) | 2.459(3) | 171(6) |
| C(2)-H(2A)···O(22)   | 0.95      | 2.43      | 3.154(3) | 132.4  |
| C(3)-H(3A)···Cl(1)   | 0.95      | 2.94      | 3.391(2) | 110.5  |
| C(3)-H(3A)···Cl(1)#3 | 0.95      | 2.70      | 3.563(2) | 150.9  |
| C(4)-H(4A)···Cl(1)#4 | 0.98      | 2.83      | 3.600(2) | 135.5  |
| C(5)-H(5A)···Cl(1)   | 0.99      | 2.95      | 3.747(2) | 138.0  |
| C(5)-H(5A)···Cl(1)#5 | 0.99      | 2.83      | 3.508(2) | 126.4  |
| C(5)-H(5B)···O(2)#6  | 0.99      | 2.33      | 3.291(3) | 163.3  |

Symmetry transformations used to generate equivalent atoms:

#1 2/3-x, 1/3-y, 4/3-z; #2 2/3-y, 1/3+x-y, -2/3+z; #3 +y-x, -x, +z; #4 +y, -x+y, -z; #5 +y, -x+y, 1-z; #6 1/3+y-x, 2/3-x, -1/3+z

---

**3**

|                        |           |           |            |        |
|------------------------|-----------|-----------|------------|--------|
| O(1)-H(1)···O(2)#1     | 0.818(10) | 1.841(10) | 2.659(3)   | 178(3) |
| C(1)-H(1A)···Cl(1)#2   | 0.95      | 2.93      | 3.484(3)   | 118.4  |
| C(2)-H(2A)···Cl(2)#3   | 0.95      | 2.71      | 3.533(3)   | 145.9  |
| C(3)-H(3A)···Cl(1)     | 0.95      | 2.72      | 3.565(3)   | 148.9  |
| C(4)-H(4A)···Cl(1)     | 0.98      | 2.86      | 3.738(3)   | 149.4  |
| C(4)-H(4B)···Cl(2)#4   | 0.98      | 2.89      | 3.573(3)   | 127.5  |
| C(4)-H(4B)···Cl(4)#4   | 0.98      | 2.79      | 3.703(3)   | 155.0  |
| C(4)-H(4C)···Cl(4)#2   | 0.98      | 2.76      | 3.674(3)   | 154.6  |
| C(5)-H(5A)···Cl(1)#3   | 0.99      | 2.93      | 3.593(3)   | 125.5  |
| C(5)-H(5A)···Cl(3)#3   | 0.99      | 2.63      | 3.539(3)   | 153.3  |
| C(5)-H(5B)···Cl(4)     | 0.99      | 2.74      | 3.423(3)   | 126.9  |
| O(3)-H(3)···Cl(6)      | 0.818(10) | 2.322(15) | 3.0977(19) | 159(3) |
| C(7)-H(7A)···Cl(5)#5   | 0.95      | 2.93      | 3.532(3)   | 122.7  |
| C(8)-H(8A)···O(6)#6    | 0.95      | 2.43      | 3.223(3)   | 140.7  |
| C(9)-H(9A)···Cl(5)#3   | 0.95      | 2.68      | 3.531(3)   | 150.1  |
| C(10)-H(10C)···O(5)#3  | 0.98      | 2.54      | 3.153(3)   | 120.8  |
| C(11)-H(11A)···O(4)#5  | 0.99      | 2.45      | 3.298(3)   | 143.2  |
| C(11)-H(11B)···Cl(3)#3 | 0.99      | 2.89      | 3.421(3)   | 114.5  |
| O(5)-H(5)···Cl(6)      | 0.816(10) | 2.205(15) | 2.997(2)   | 164(4) |
| C(13)-H(13A)···Cl(5)#7 | 0.95      | 2.81      | 3.582(3)   | 138.7  |
| C(14)-H(14A)···Cl(1)#3 | 0.95      | 2.86      | 3.598(2)   | 135.2  |
| C(14)-H(14A)···O(4)#7  | 0.95      | 2.49      | 3.163(3)   | 127.8  |
| C(15)-H(15A)···Cl(2)#4 | 0.95      | 2.71      | 3.386(3)   | 128.4  |
| C(15)-H(15A)···Cl(3)#4 | 0.95      | 2.82      | 3.646(3)   | 146.6  |
| C(16)-H(16B)···Cl(4)#7 | 0.98      | 2.99      | 3.721(3)   | 132.6  |
| C(16)-H(16C)···Cl(5)#7 | 0.98      | 2.94      | 3.661(3)   | 131.2  |
| C(17)-H(17A)···Cl(3)   | 0.99      | 2.79      | 3.691(3)   | 151.0  |
| C(17)-H(17B)···Cl(5)#4 | 0.99      | 2.77      | 3.424(3)   | 123.8  |

Symmetry transformations used to generate equivalent atoms:

#1 -x, -y, 1-z; #2 -x, 1/2+y, 1/2-z; #3 +x, 1/2-y, 1/2+z; #4 +x, 1+y, +z; #5 1-x, 1/2+y, 3/2-z; #6 1-x, 1-y, 1-z; #7 +x, 1/2-y, -1/2+z

---

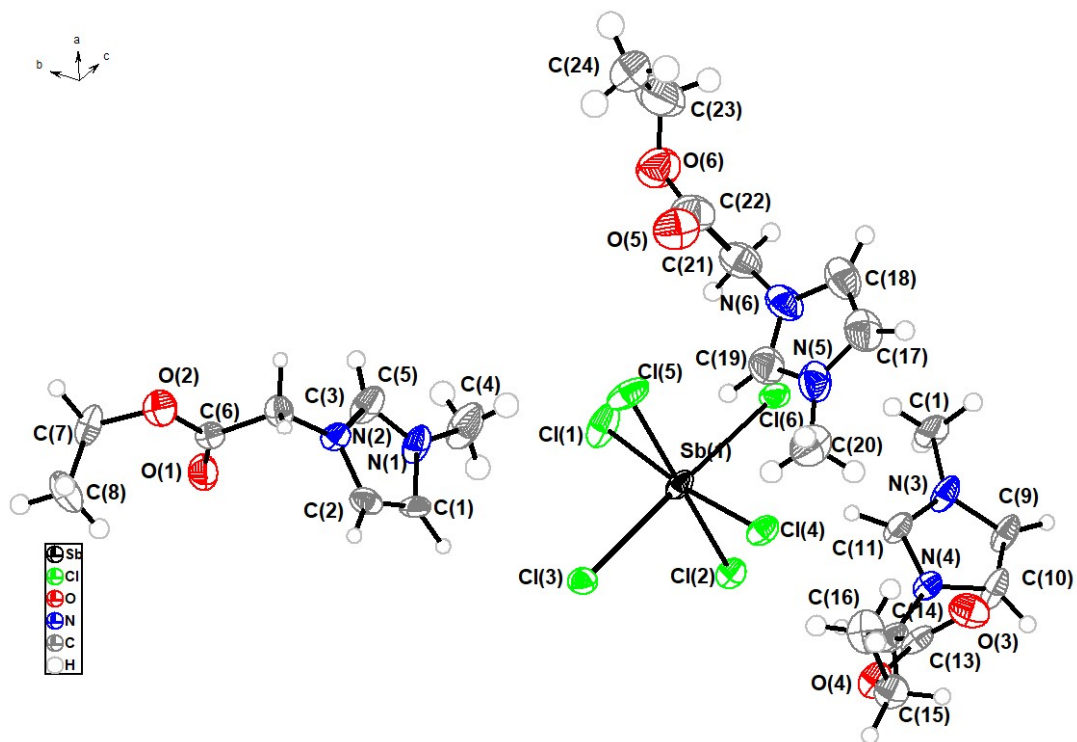

**Figure S1.** ORTEP drawing (50% ellipsoid probability) of the asymmetric unit of **1**.

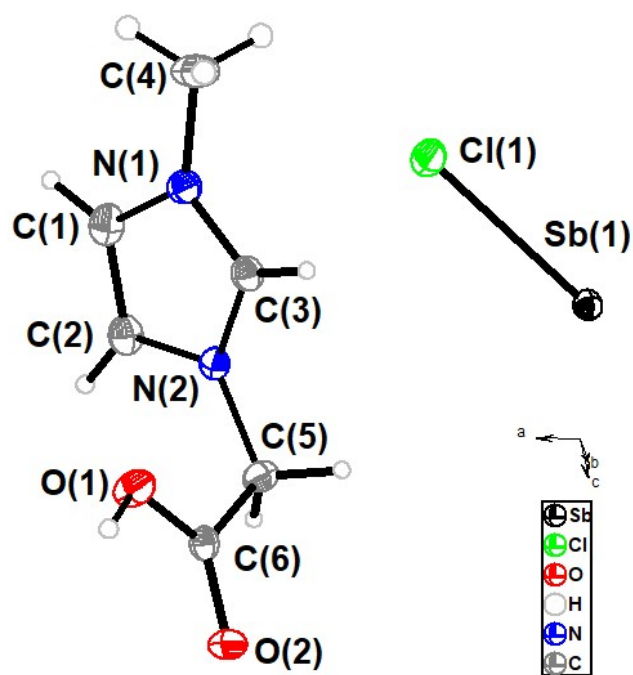

**Figure S2.** ORTEP drawing (50% ellipsoid probability) of the asymmetric unit of **2**.

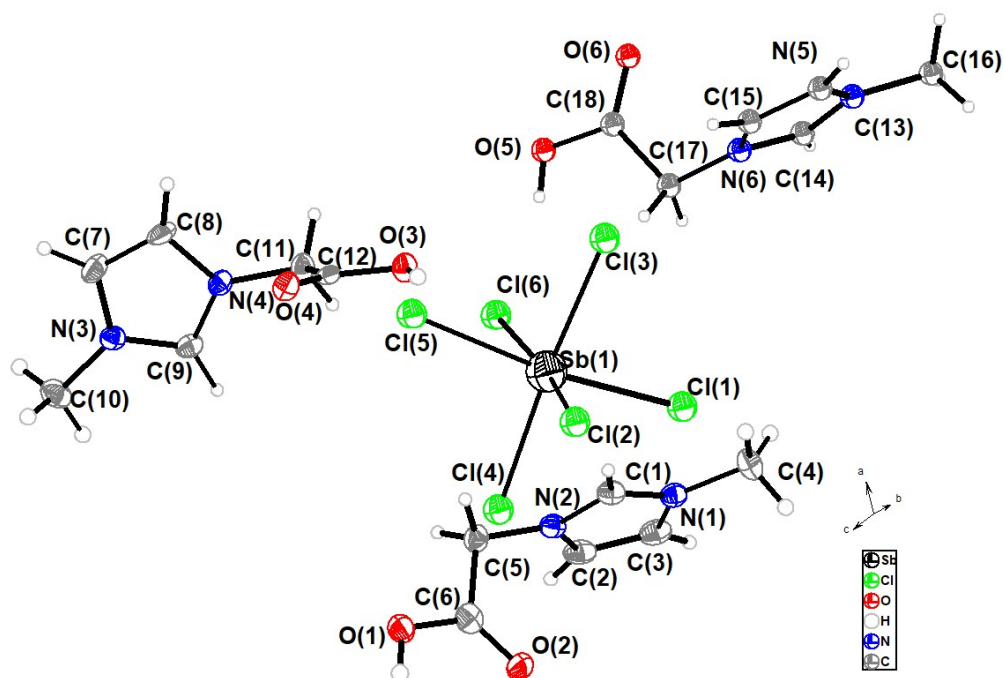

**Figure S3.** ORTEP drawing (50% ellipsoid probability) of the asymmetric unit of **3**.

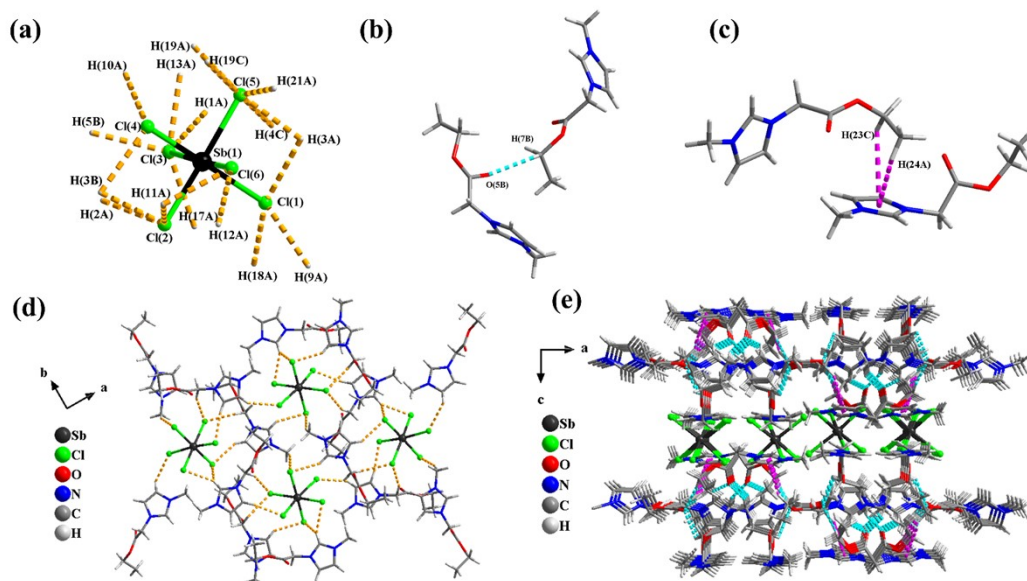

**Figure S4.** (a) The hydrogen bonds around each  $[\text{SbCl}_6]^{3-}$  anion in **1**; (b) C-O $\cdots$ H bond in **1**; (c) cation- $\pi$  interaction in **1**; (d) a two-dimensional anion layer formed by hydrogen bonds C-H $\cdots$ Cl observed along the  $c$ -axis; (e) the packing diagram observed along the  $b$ -axis. The purple and cyan dashed lines represent the cation- $\pi$  interaction and the C-O $\cdots$ H bond, respectively, connecting the anion and cation layers.

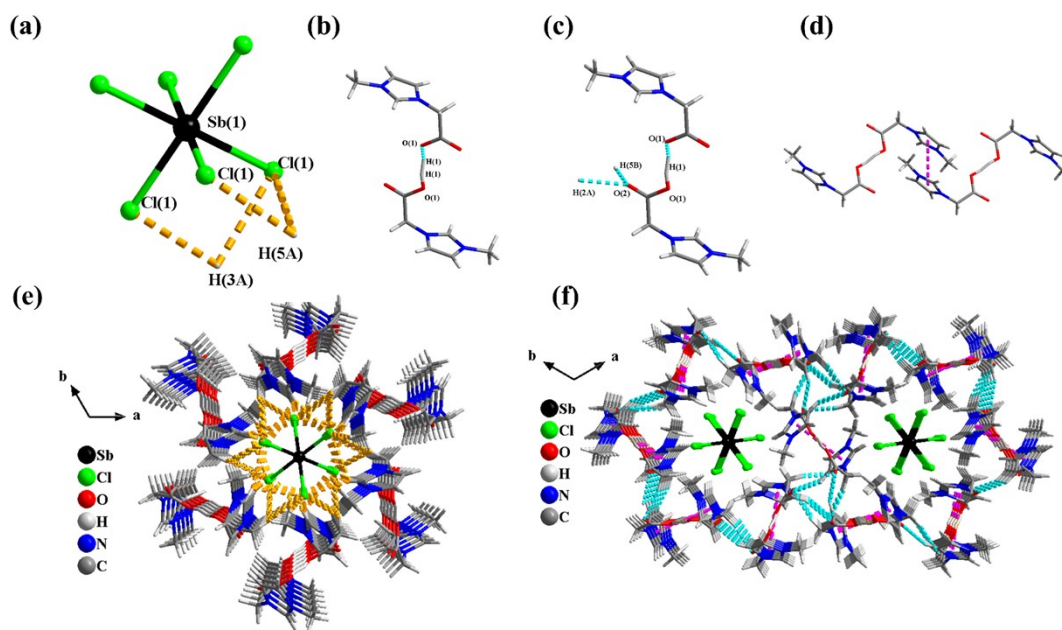

**Figure S5.** (a) The hydrogen bonds around each  $[SbCl_6]^{3-}$  anion in **2**; (b) the two organic in **2** share one H(1); (c) C-O...H bond in **2**; (d)  $\pi \cdots \pi$  interaction in **2**; (e) a one-dimensional tubular structure formed by hydrogen bond C-H...Cl view along the *c*-axis; (f) the packing diagram view along the *c*-axis. The purple and cyan dotted lines represent the  $\pi \cdots \pi$  interaction and C-O...H bond, respectively.

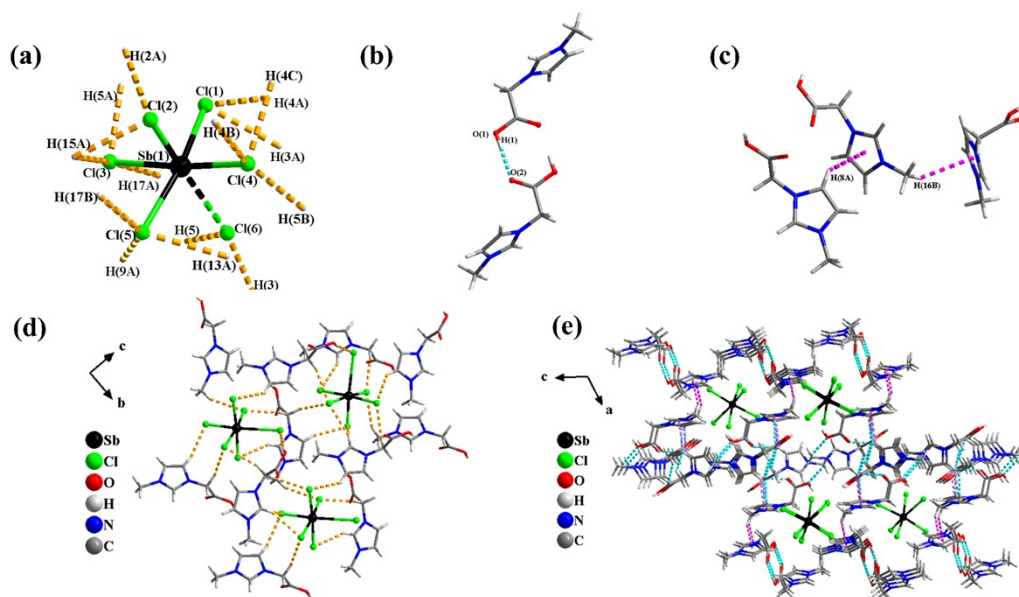

**Figure S6.** (a) The hydrogen bonds around each  $[SbCl_6]^{3-}$  anion in **3**; (b) C-O...H bond in **3**; (c) cation- $\pi$  interaction in **3**; (d) a two-dimensional anion layer formed by hydrogen bonds C-H...Cl viewed along the *a*-axis; (e) the packing diagram viewed along the *b*-axis. The purple and cyan dashed lines represent the cation- $\pi$  interaction and the C-O...H bond, respectively.



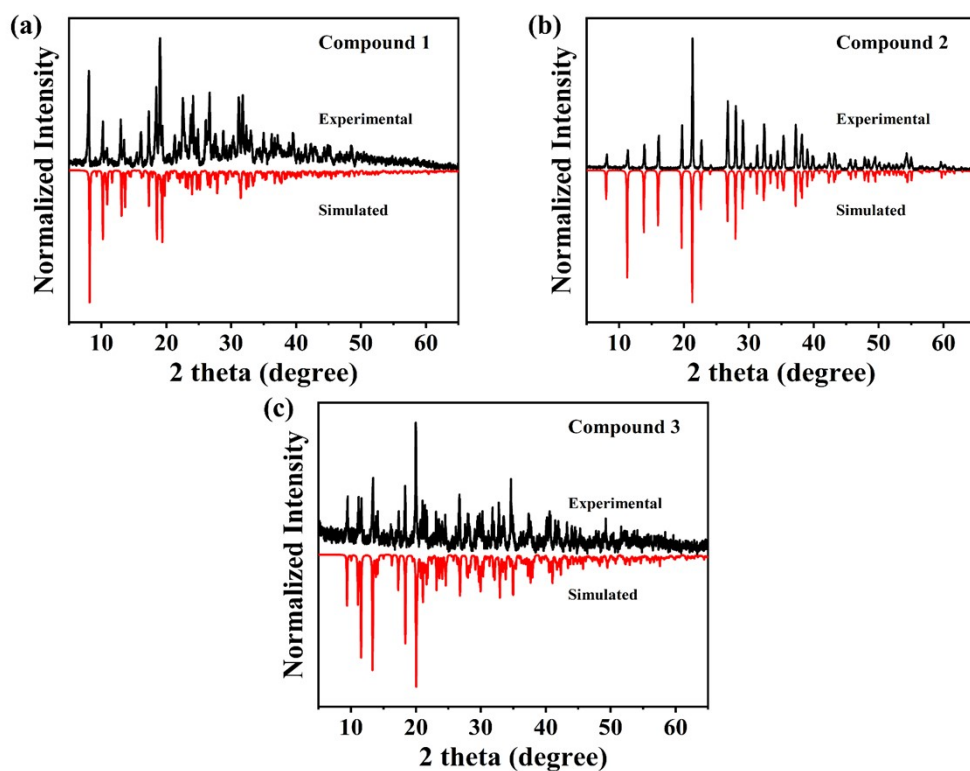

**Figure S7.** Experimental and simulated PXRD patterns of **1**, **2**, and **3**.

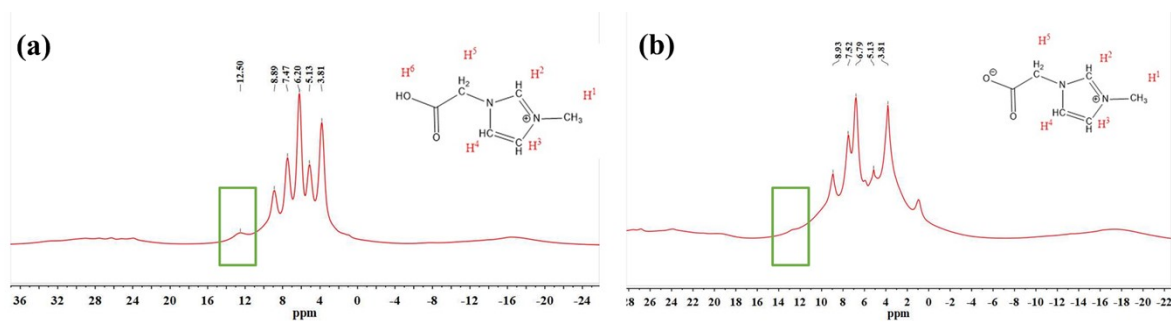

**Figure S8.**  $^1\text{H NMR}$  of **3** (a) and **3**  $\rightarrow$  **2** (b).

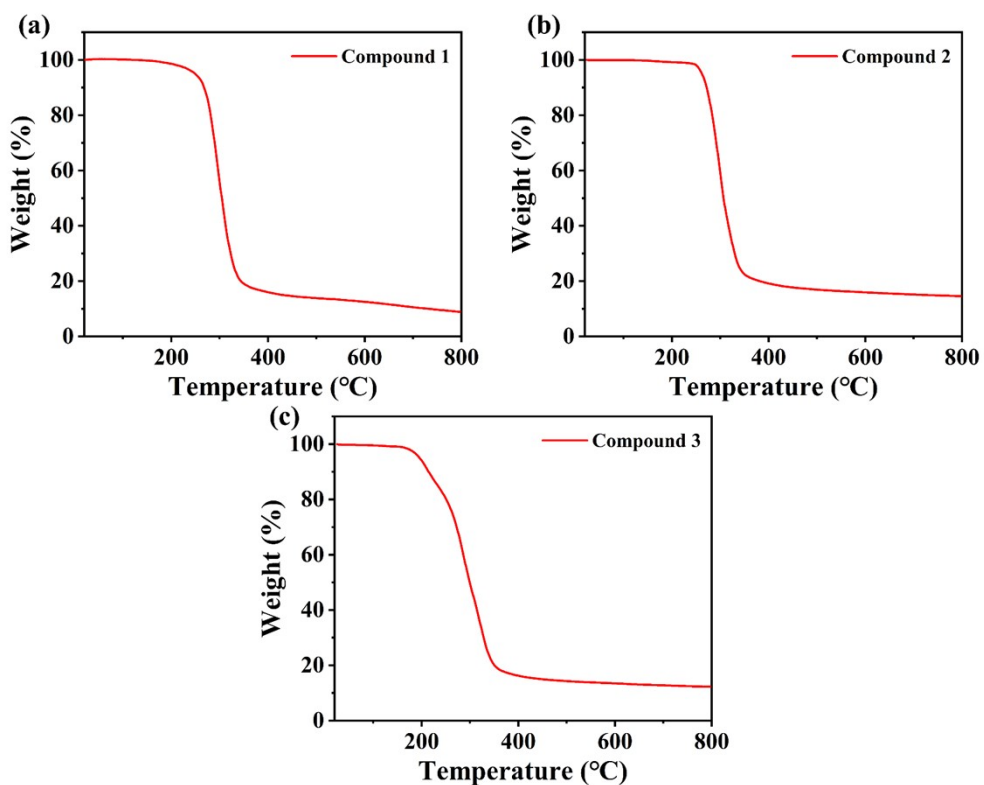

**Figure S9.** Thermogravimetric curves for **1**, **2**, and **3**.

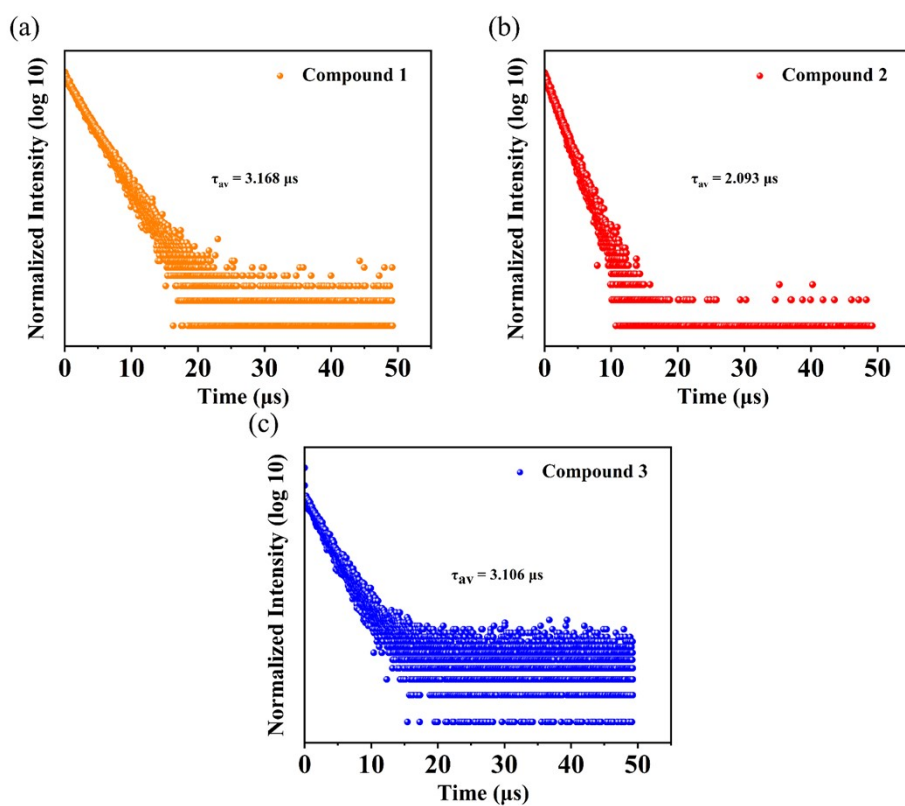

**Figure S10.** The PL decay spectra at 300K for **1**, **2**, and **3**.

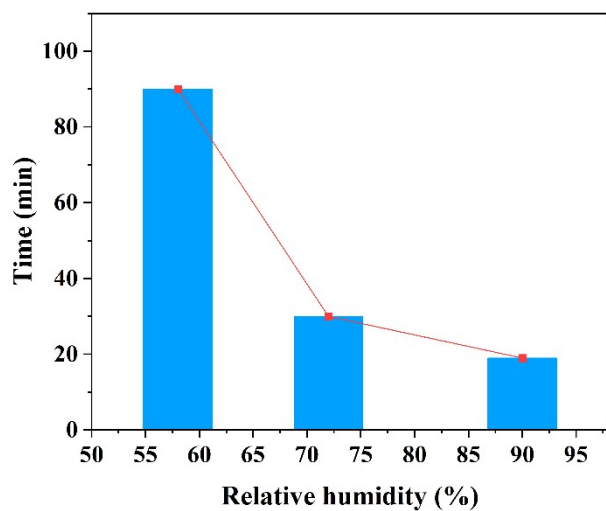

**Figure S11.** Comparison of transition time at 90% RH, 72% RH, and 58% RH.

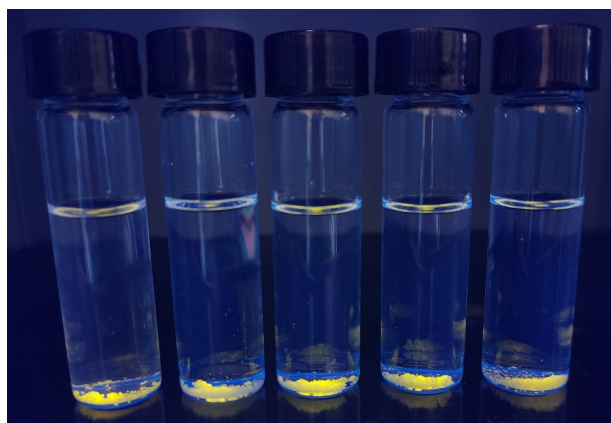

**Figure S12.** Images for the sample of **3** being immersed in anhydrous solvents for 6 hours. From left to right: acetonitrile, toluene, ethyl acetate, isopropanol, and tetrahydrofuran.

**Standard pH paper**

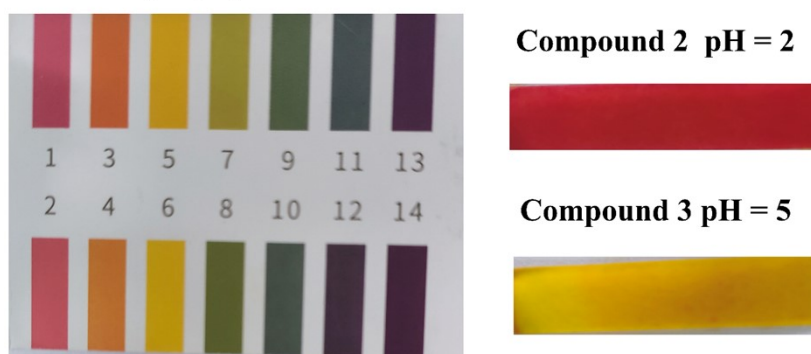

**Figure S13.** In acetonitrile solution, the pH value of the solution was 5 when the compound was yellow-green-emission **3** and was 2 when it was converted to green-emission **2**.

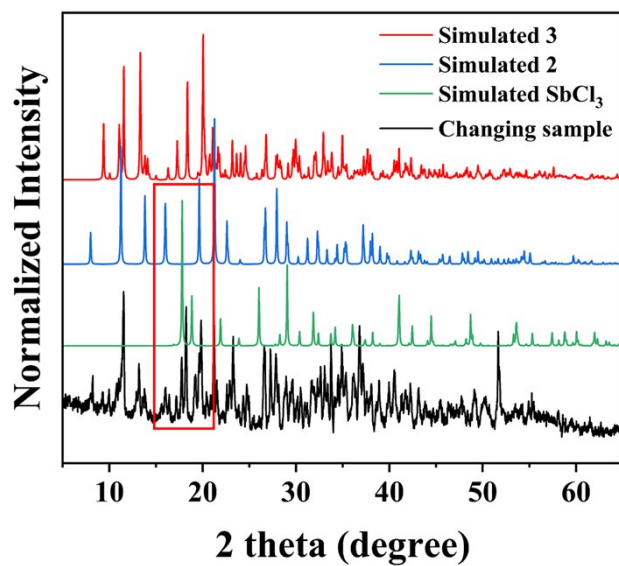

**Figure S14.** PXRD diagram showing that SbCl<sub>3</sub> was released during the conversion of **3** to **2**.

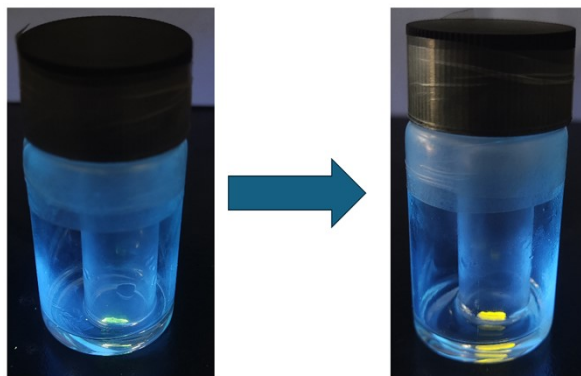

**Figure S15.** The process photograph of converting **2** to **3** by fumigation with SbCl<sub>3</sub> and HCl.
